# Supplementary material for: The Antibacterial Effect of Cannabigerol toward Streptococcus mutans Is Influenced by the Autoinducers 21-CSP and AI-2
Source: MDPI journal article supplement (doi:10.3390/biomedicines11030668), 2023-02-22
Supplement: s1 [file s1]

**Supplementary Table S1.** Primers used for real-time PCR.

|                 | <b>Forward Primer</b>       | <b>Reverse Primer</b>             |
|-----------------|-----------------------------|-----------------------------------|
| <i>16S rRNA</i> | CCTACGGGAGGCAGCAGTAG        | CAACAGAGCTTTAGATCCGAAA            |
| <i>comA</i>     | ACGAGCCTAACAAGGGGATT        | CCCTGAGGCATTTGTTCAAT              |
| <i>comC</i>     | GACTGATGAATTAGAGATTATCATTGG | TTCCCAAAGCTTGTGTAAAACT            |
| <i>comD</i>     | TGAAAATAGCATAGGTGAG TCAAAG  | ATTTAGGTTAGCTGATTAACACTATAC<br>AC |
| <i>comE</i>     | CACAACAACCTTATTGACGCTATCCC  | TGATTGGCTACTTCCAGTCCTTTC          |
| <i>nlmA</i>     | AATGGACAGCCAAACACTTTC       | TAACAAGAGTCGCACCTGCC              |
| <i>nlmB</i>     | TGTCAGAAGTTTTTGGTGG         | ACTCCAGCACATCCAGCAAG              |
| <i>nlmC</i>     | TTGTGCAGCAGGTATTGCTC        | AAGAGCTCCTCCGATTCTC               |
| <i>luxS</i>     | ACTGTTCCCCTTTTGGCTGTC       | AACTTGCTTTGATGACTGTGGC            |

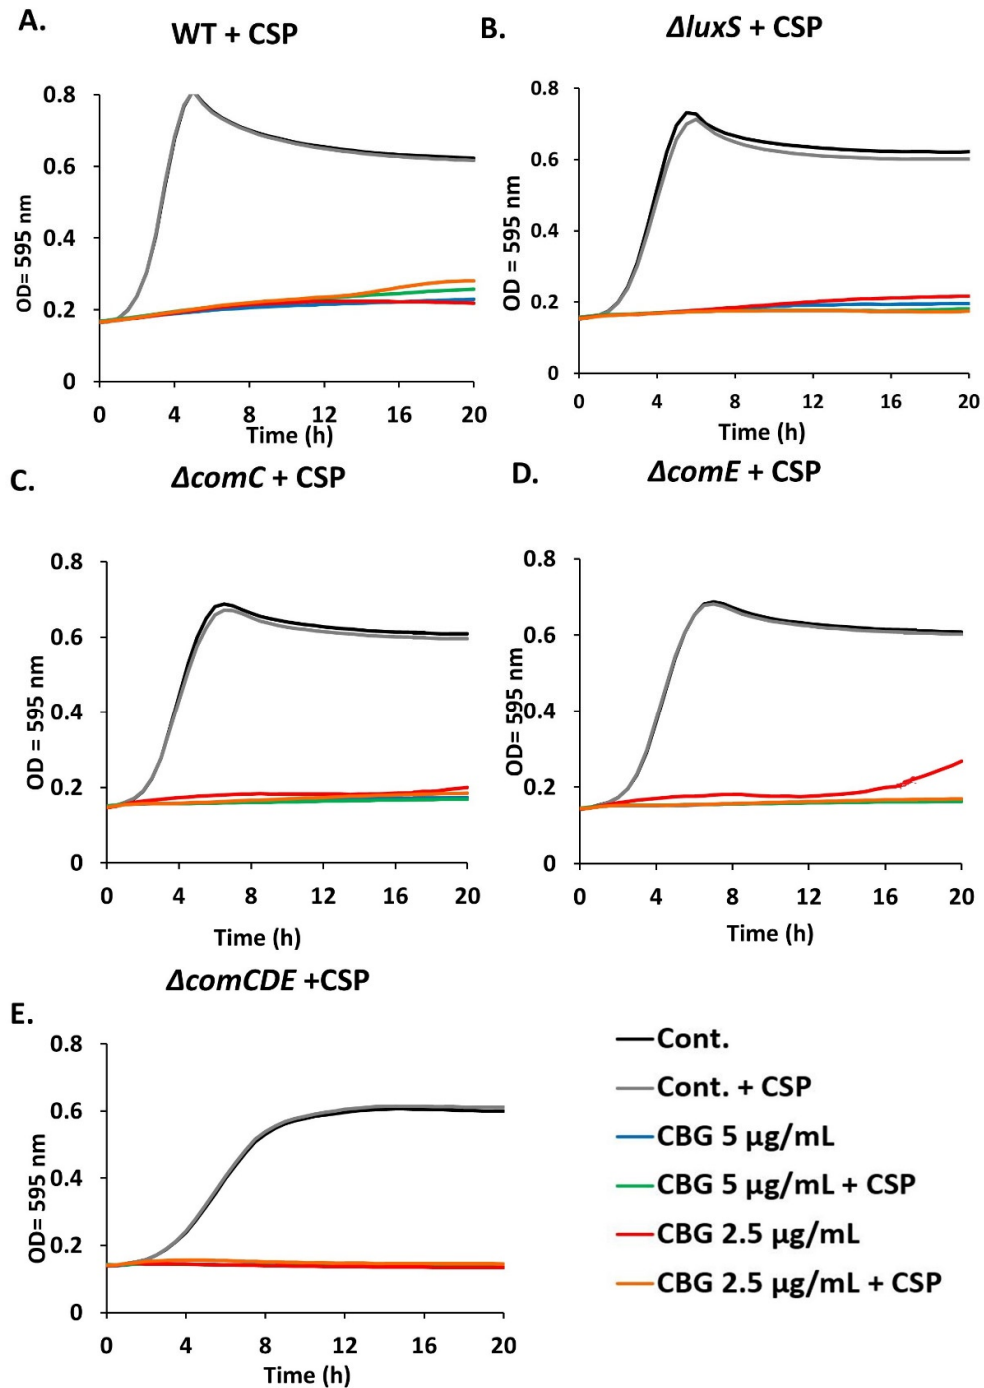

**Supplementary Figure S1: 21-CSP did not prevent the anti-bacterial effect of 2.5 and 5  $\mu\text{g/mL}$  CBG on the various *S. mutans* strains. A-E.** Kinetic studies of the planktonic growth of *S. mutans* incubated in the absence or presence of CBG (2.5 or 5  $\mu\text{g/mL}$ ) with or without 21-CSP (1  $\mu\text{g/mL}$ ) with an initial OD<sub>600nm</sub> of 0.1. **A.** WT; **B.**  $\Delta luxS$ ; **C.**  $\Delta comC$ ; **D.**  $\Delta comE$ ; and **E.**  $\Delta comCDE$ .  $n = 3$ .

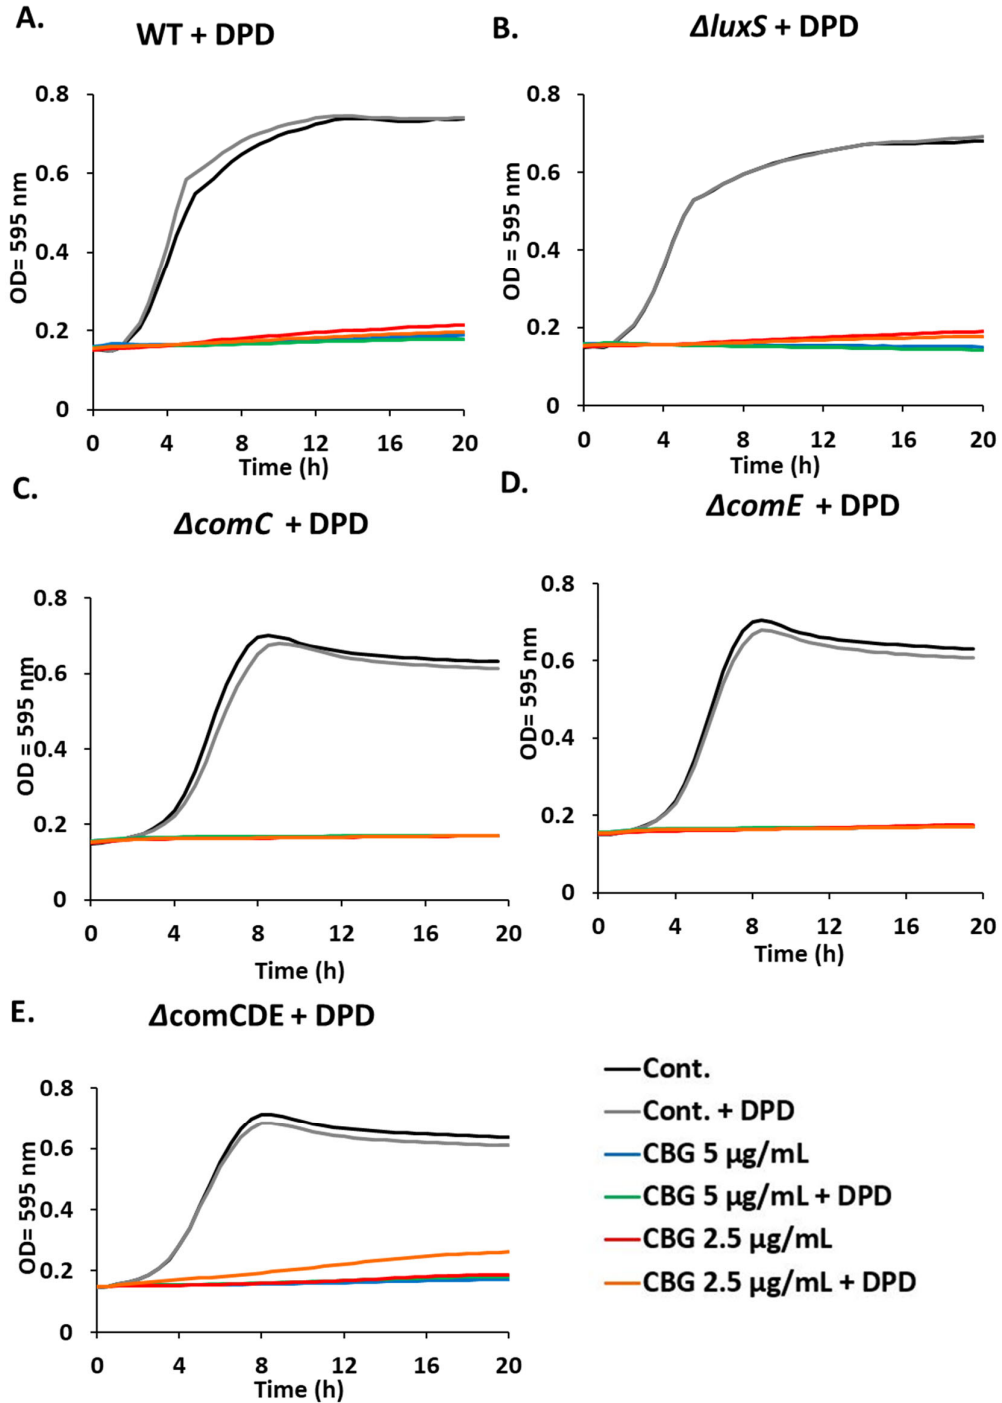

**Supplementary Figure S2: AI-2 did not prevent the anti-bacterial effect of CBG of *S. mutans* strains at higher concentrations.** A-E. Kinetic studies of the planktonic growth of *S. mutans* incubated in the absence or presence of CBG (2.5 or 5  $\mu\text{g/mL}$ ) with or without DPD (pre-AI-2) (5  $\mu\text{M}$ ) with an initial  $\text{OD}_{600\text{nm}}$  of 0.1. A. WT; B.  $\Delta\text{luxS}$ ; C.  $\Delta\text{comC}$ ; D.  $\Delta\text{comE}$ ; and E.  $\Delta\text{comCDE}$ .  $n = 3$ .

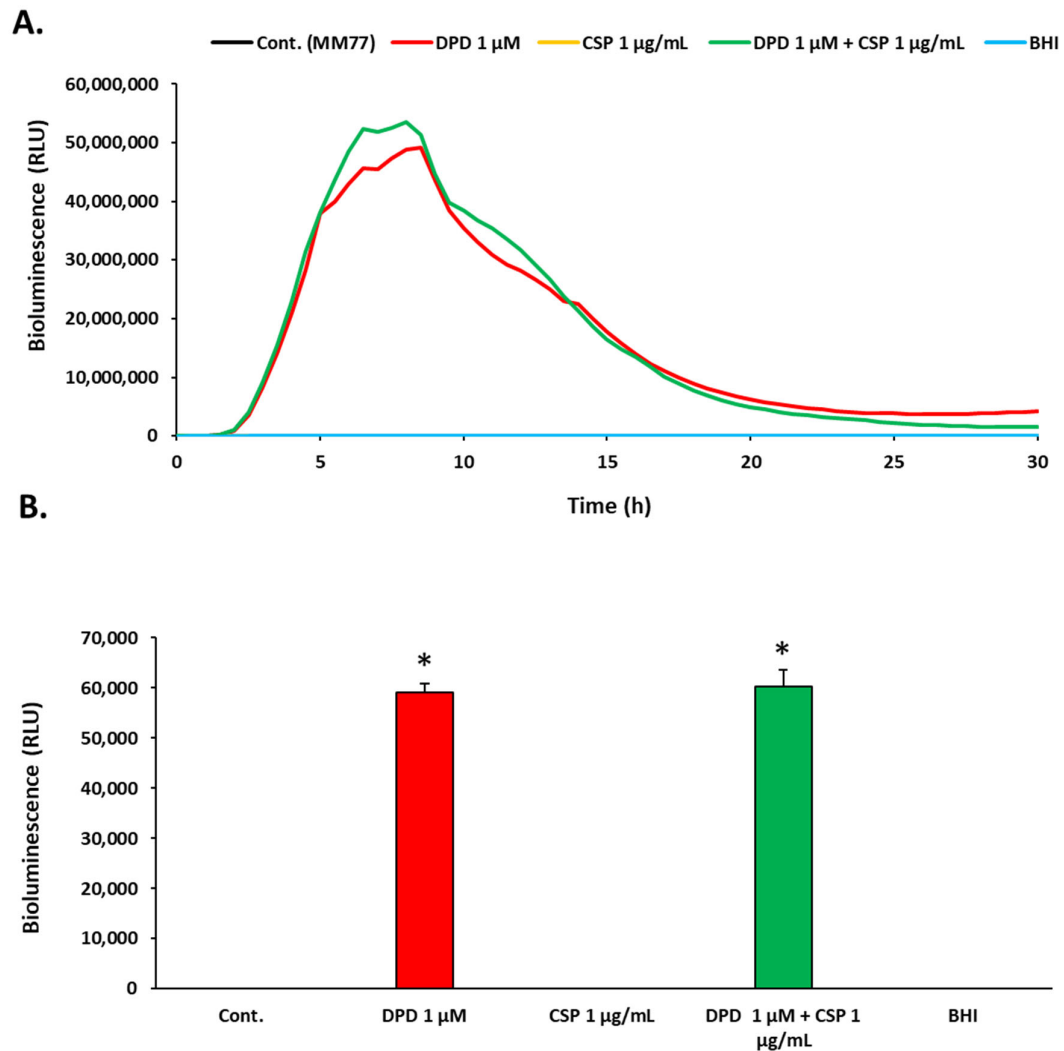

**Supplementary Figure S3:** The relative bioluminescence of *Vibrio harveyi* strain MM77 incubated in the absence or presence of 1  $\mu$ M DPD and/or 1  $\mu$ g/mL 21-CSP was measured for 30 h. The bioluminescence was corrected for differences in bacterial growth by simultaneously measuring the optical density at 595 nm.  $n = 3$ . **B.** The relative bioluminescence as determined by the area under the curve (AUC) of the graph presented in **A.**  $n = 3$ .

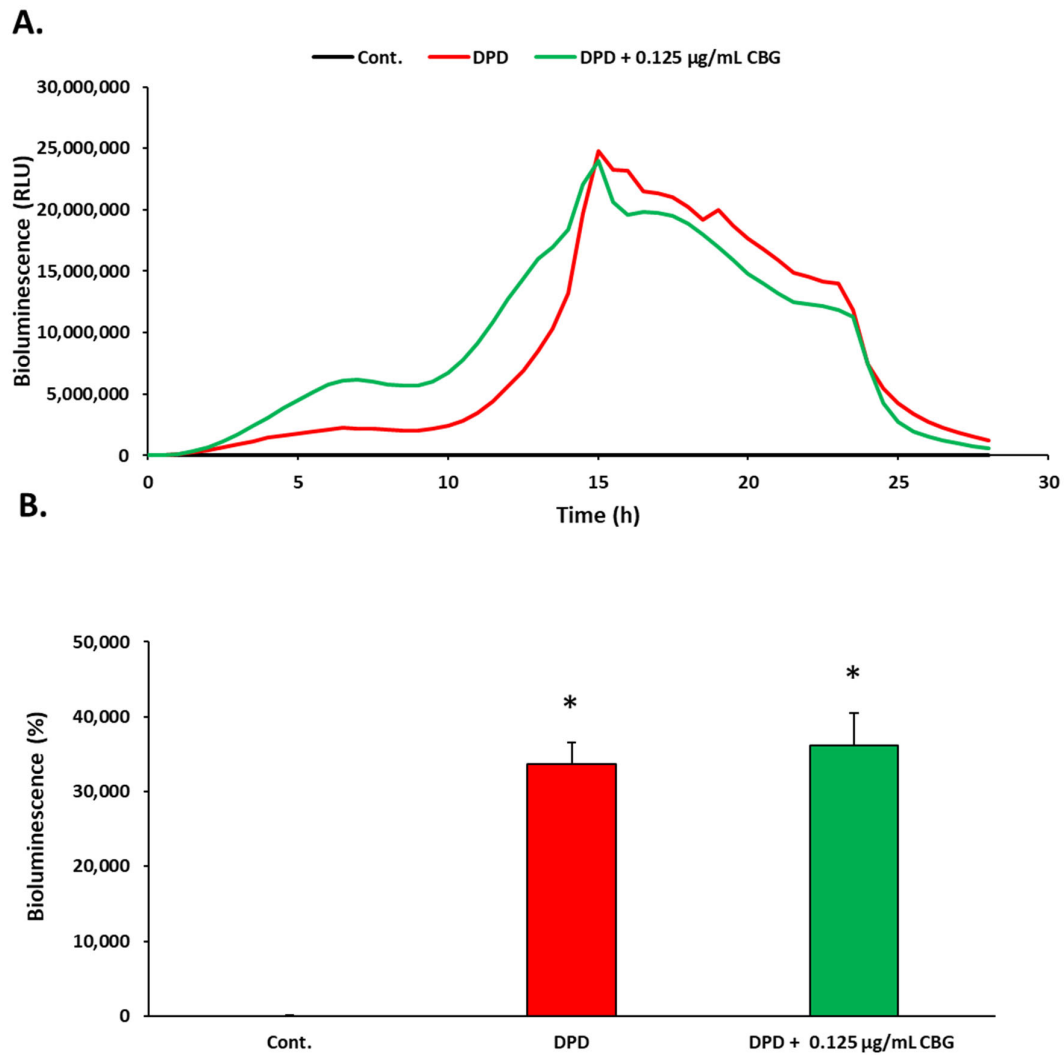

**Supplementary Figure S4:** The relative bioluminescence of *Vibrio harveyi* strain MM77 incubated in the absence or presence of 1 µM DPD and/or 1 µM DPD + 0.125 µg/mL CBG was measured for 30 h. The bioluminescence was corrected for differences in bacterial growth by simultaneously measuring the optical density at 595 nm.  $n = 3$ . **B.** The relative bioluminescence as determined by the area under the curve (AUC) of the graph presented in **A.**  $n = 3$ .
